# Supplementary material for: Observation of magnetic vortex configuration in non-stoichiometric Fe3O4 nanospheres
Source: Royal Society of Chemistry journal article supplement (doi:10.1039/d3na00433c), 2023-01-01
Supplement: d3na00433c1.pdf [file d3na00433c1.pdf]

## Electronic Supporting Information

### Observation of Magnetic Vortex Configuration in Non-stoichiometric Fe<sub>3</sub>O<sub>4</sub> Nanospheres

Gopal Niraula<sup>a, b</sup>, Denilson Toneto<sup>c</sup>, Gerardo F. Goya<sup>d</sup>, Giorgio Zoppellaro<sup>e</sup>, Jose A. H. Coaquira<sup>b</sup>, Diego Muraca<sup>f</sup>, Juliano C. Denardin<sup>g\*</sup>, Trevor P. Almeida<sup>h</sup>, Marcelo Knobel<sup>f</sup>, Ahmad I. Ayesh<sup>i</sup>, and Surender K. Sharma<sup>j, a\*</sup>

<sup>a</sup>Department of Physics, Federal University of Maranhao, Sao Luis 65080-805, Brazil

<sup>b</sup>Laboratory of Magnetic Materials, NFA, Institute of Physics, University of Brasilia, Brasilia 70910-900, Brazil

<sup>c</sup>Universidad Central de Chile, 8330601 Santiago, Chile

<sup>d</sup>Instituto de Nanociencia y Materiales de Aragón (INMA), Universidad de Zaragoza, 50018, Zaragoza, Spain

<sup>e</sup>Regional Centre of Advanced Technologies and Materials, Palacky University in Olomouc, Slechtitelu 27, 77900 Olomouc, Czech Republic

<sup>f</sup>Institute of Physics “Gleb Wataghin” (IFGW), University of Campinas (Unicamp), Campinas, SP, Brazil

<sup>g</sup>Universidad de Santiago de Chile (USACH), CEDENNA and Departamento de Física, Santiago 9170124, Chile

<sup>h</sup>SUPA, School of Physics and Astronomy, University of Glasgow, Glasgow, G12 8QQ, UK

<sup>i</sup>Physics Program, Department of Math., Stat. and Physics, College of Arts and Sciences, Qatar University, P. O. Box 2713, Doha, Qatar

<sup>j</sup>Department of Physics, Central University of Punjab, Bathinda, 151401, India

\*Corresponding author: [surender76@gmail.com](mailto:surender76@gmail.com); ; [juliano.denardin@usach.cl](mailto:juliano.denardin@usach.cl)

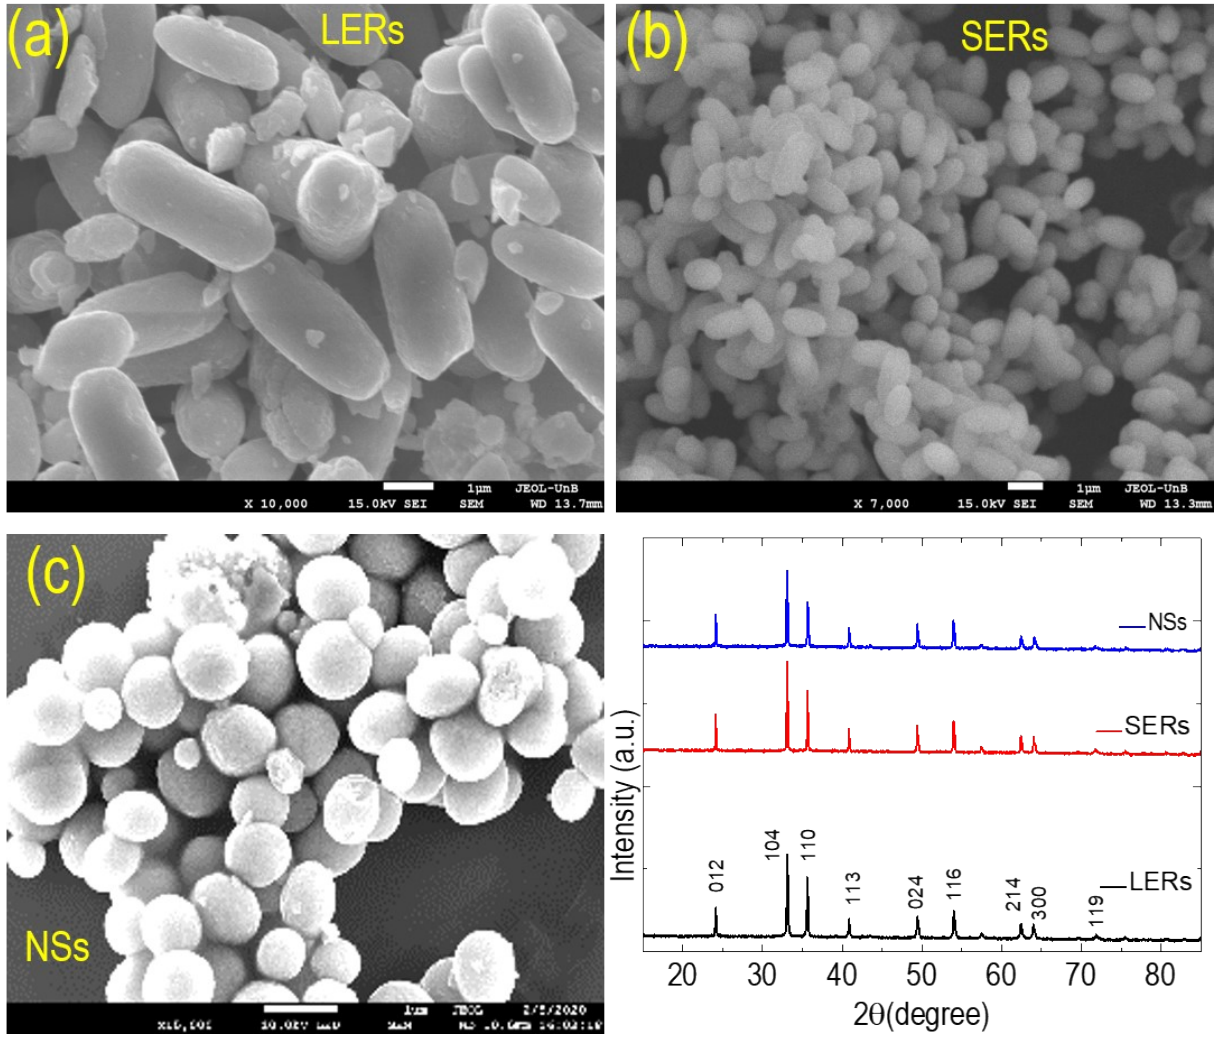

S1: SEM and XRD of  $\alpha$ -Fe<sub>2</sub>O<sub>3</sub> (JCPDS: 89-0597)

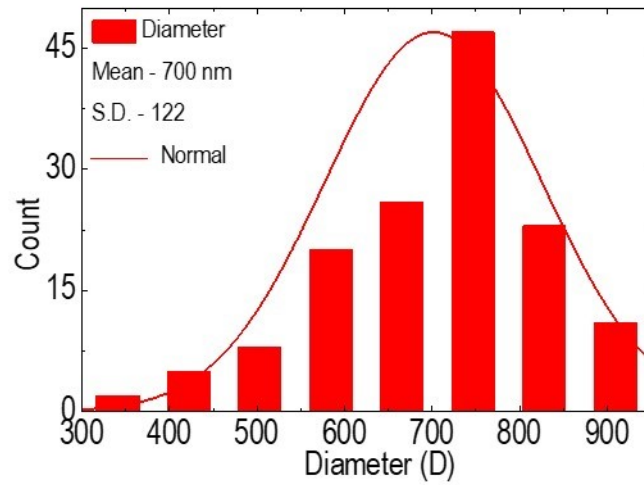

**S2: Size distribution of Fe<sub>3</sub>O<sub>4</sub> NSs**

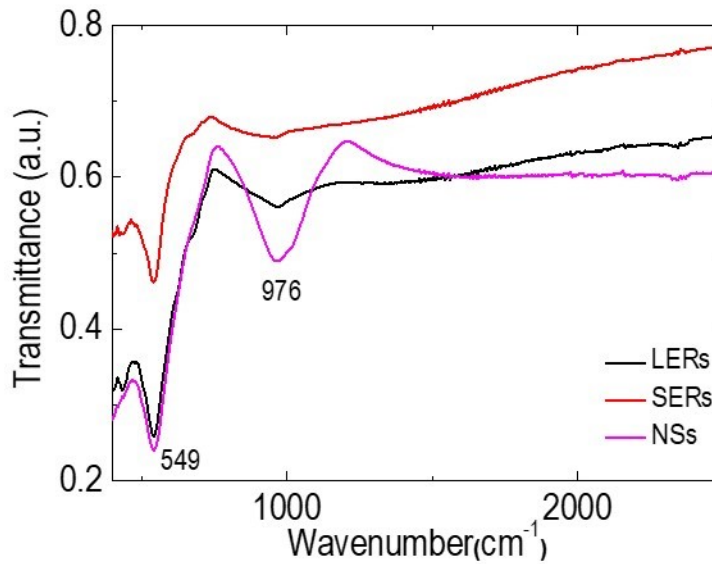

**S3: FT-IR of all the samples, i.e. LERs, SERs, and NSs. The detected peaks 549 cm<sup>-1</sup> and 976 cm<sup>-1</sup> represent iron oxide (Fe<sub>3</sub>O<sub>4</sub> here) and phosphate anion, respectively**

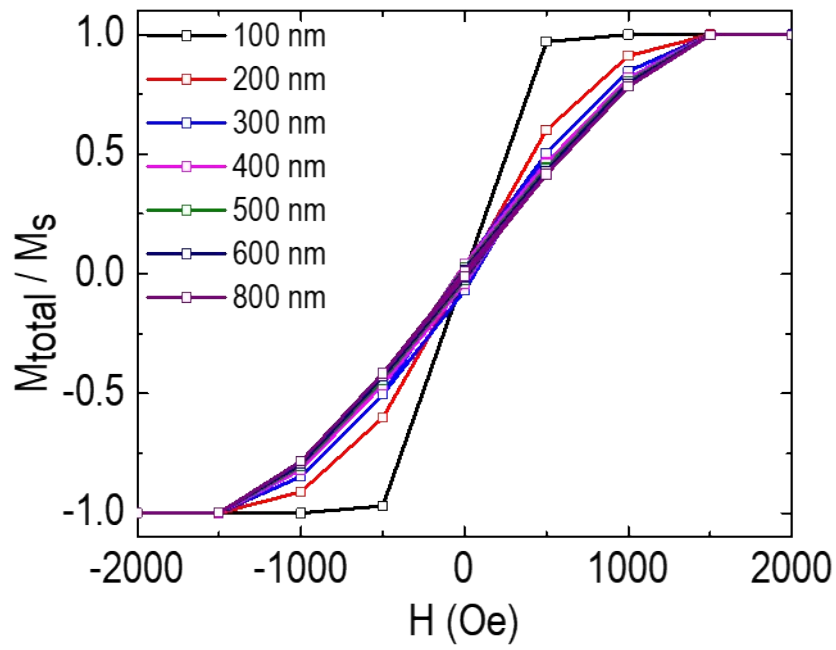

**S4: Simulated M-H hysteresis loop varying the size of NSs.**

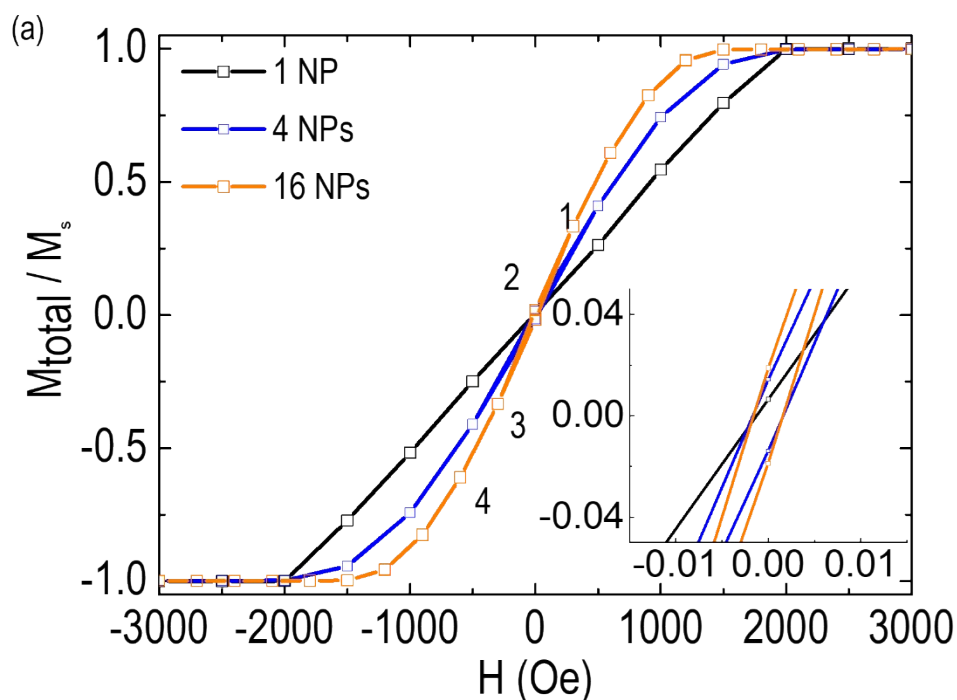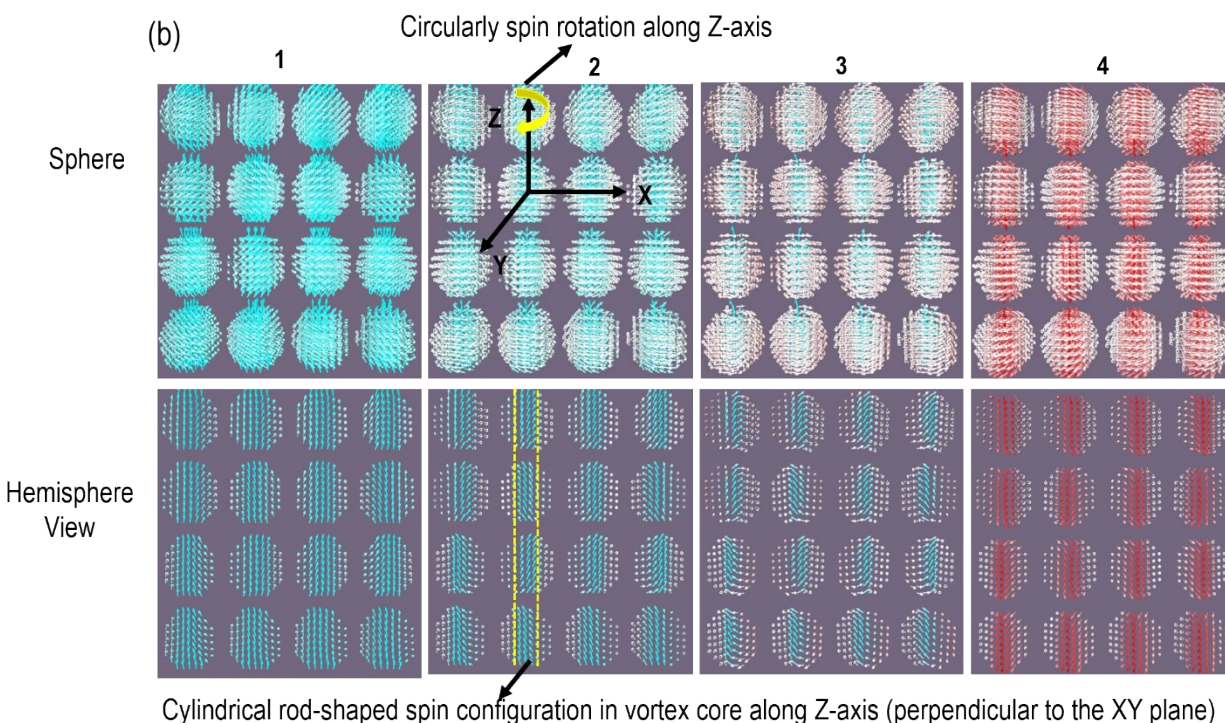

**S5: (a) Simulated M-H hysteresis loop varying number of spheres at NPs diameter 700 nm. (b) Upper row contains full-sphere spin configuration rotating around vortex core axis (yellow arrow), i.e., Z-axis (perpendicular) and lower row with corresponding cut-sphere (hemisphere) to show rod-shaped vortex evolution towards Z-axis (parallel yellow dotted line).**

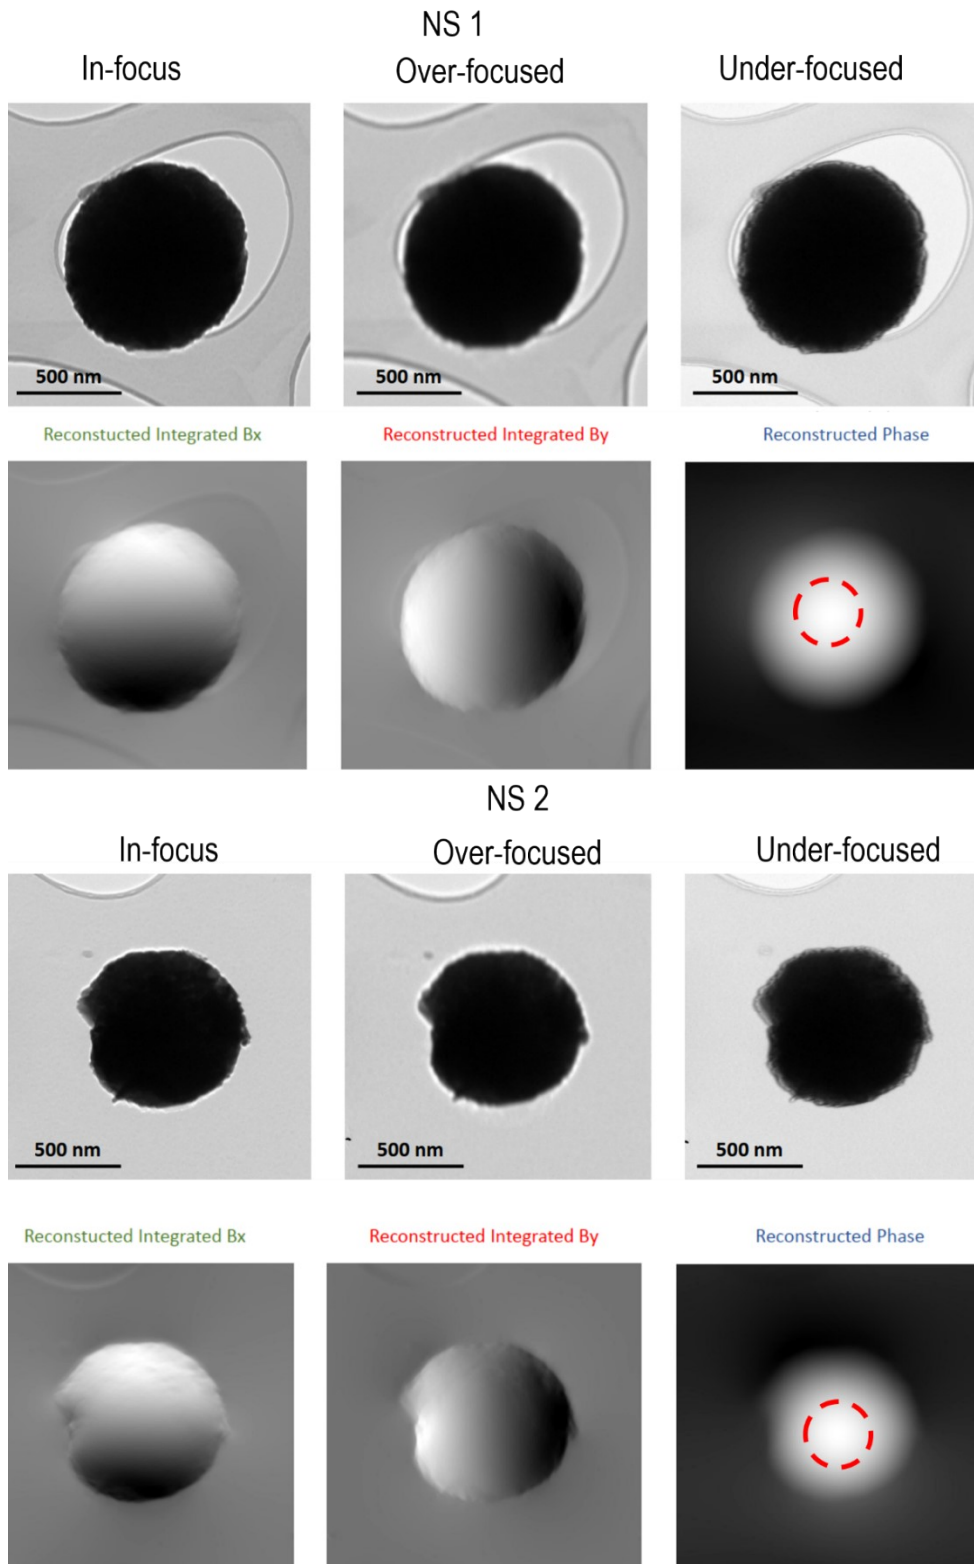

**S6: Focus-series of Fresnel contrast imaging technique for two isolated sample NS1 and NS2 and their corresponding reconstructed phase along different field axis.**

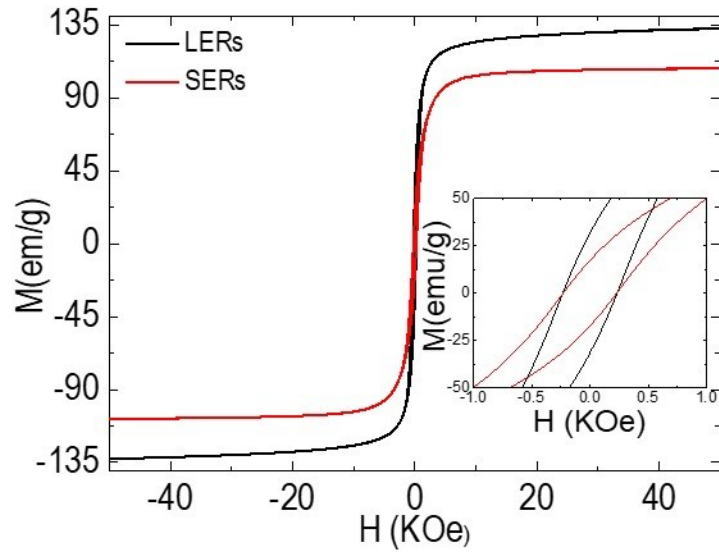

**S7: Hysteresis loss of LERs and SERs measured at 300 K applying field of +/- 50 kOe**

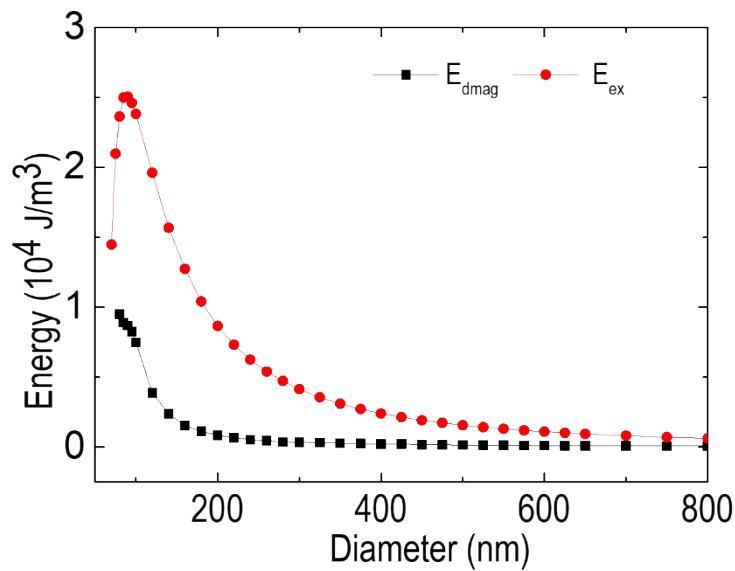

**S8: Energy profile of NSs obtained by means of micro-magnetic simulation where magneto-static energy (demagnetizing) is dominated by exchange energy.**

**Table 1: Comparative study of lattice parameter, phase analysis, and magnetic measurement**

| Sample     | Lattice Parameter (nm)<br>$\pm 0.0005$                              | Phase Analysis                      |                     |                                    |                     | Magnetic Measurement         |               |
|------------|---------------------------------------------------------------------|-------------------------------------|---------------------|------------------------------------|---------------------|------------------------------|---------------|
|            |                                                                     | XRD( $\pm 1$ )                      |                     | Mössbauer( $\pm 2$ )               |                     | Verwey Transition Temp. (Tv) | $M_s$ (emu/g) |
|            |                                                                     | Fe <sub>3</sub> O <sub>4</sub> (%); | Fe <sup>0</sup> (%) | Fe <sub>3</sub> O <sub>4</sub> (%) | Fe <sup>0</sup> (%) |                              |               |
| Long Rods  | Fe <sub>3</sub> O <sub>4</sub><br>=0.838<br>Fe <sup>0</sup> = 0.286 | 85.5                                | 14.5                | 84                                 | 16                  |                              | 132           |
| Short rods | Fe <sub>3</sub> O <sub>4</sub><br>=0.838<br>Fe <sup>0</sup> = 0.286 | 86                                  | 12.4                | 87                                 | 11                  | 122 K                        | 108           |
| Sphere     | Fe <sub>3</sub> O <sub>4</sub><br>=0.837                            | 100                                 | -                   | 100                                | -                   |                              | 76            |

**Table 2: Magnetic properties**

| Sample | $M_s$ (emu/g) | $M_r$ (emu/g) | $H_c$ (Oe) | $M_r/M_s$ |
|--------|---------------|---------------|------------|-----------|
| LERs   | 132           | 31            | 232        | 0.23      |
| SERs   | 108           | 17            | 229        | 0.16      |
| NSs    | 70            | 10            | 21         | 0.14      |



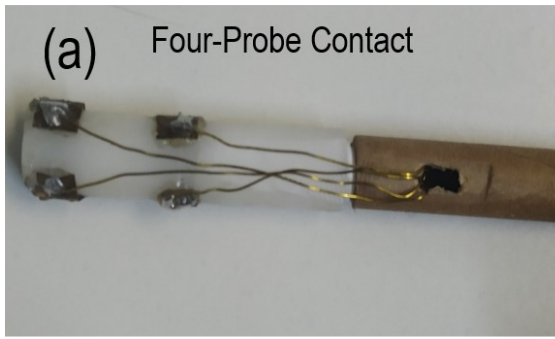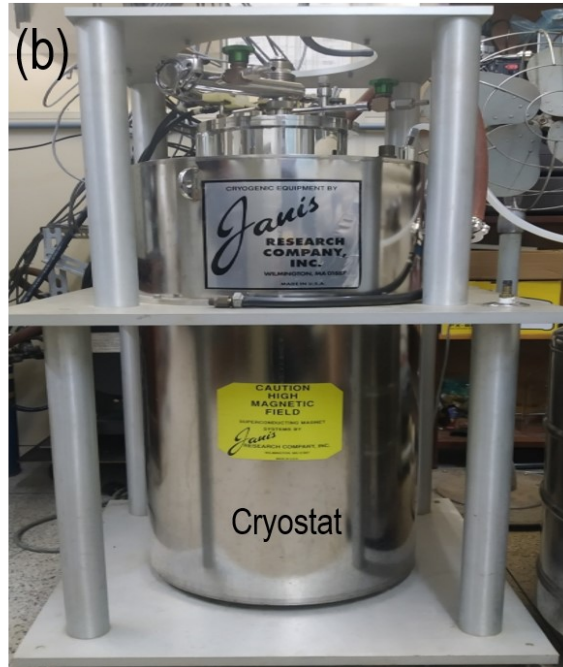

S9: Electrical measurement device. (a) Four-probe contact and (b) Cryostat

Table 3.  $^{57}\text{Fe}$  Hyperfine parameters, isomer shift (I.S.), quadrupole splitting (Q.S), hyperfine field ( $B_{\text{hf}}$ ) and spectral area (population distributions) for the diverse iron oxide preparations.

| Sample | Phase                   | site                                      | Hyperfine parameters     |                          |                                  |                           |
|--------|-------------------------|-------------------------------------------|--------------------------|--------------------------|----------------------------------|---------------------------|
|        |                         |                                           | I.S.(mm/s)<br>$\pm 0.01$ | Q.S.(mm/s)<br>$\pm 0.01$ | $B_{\text{hf}}$ (T)<br>$\pm 0.1$ | Population (%)<br>$\pm 2$ |
| LERs   | $\text{Fe}_3\text{O}_4$ | A( $\text{Fe}^{3+}$ )                     | 0.29                     | -0.07                    | 49.48                            | 18.86                     |
|        |                         | B ( $\text{Fe}^{3+}$ , $\text{Fe}^{2+}$ ) | 0.69                     | -0.15                    | 45.70                            | 35.74                     |
|        |                         | A( $\text{Fe}^{3+}$ )                     | 0.32                     | -0.002                   | 49.70                            | 26.54                     |
|        | Fe                      | -0.02                                     | 0                        | 33.00                    | 18.85                            |                           |
| SERs   | $\text{Fe}_3\text{O}_4$ | A( $\text{Fe}^{3+}$ )                     | 0.32                     | -0.04                    | 49.64                            | 16.43                     |
|        |                         | B ( $\text{Fe}^{3+}$ , $\text{Fe}^{2+}$ ) | 0.63                     | 0.07                     | 45.33                            | 33.64                     |
|        |                         | A( $\text{Fe}^{3+}$ )                     | 0.32                     | -0.002                   | 49.70                            | 41.17                     |
|        | Fe                      | -0.02                                     | 0                        | 32.96                    | 8.8                              |                           |
| NSs    | $\text{Fe}_3\text{O}_4$ | A( $\text{Fe}^{3+}$ )                     | 0.31                     | -0.064                   | 48.83                            | 55.58                     |
|        |                         | B( $\text{Fe}^{2+}$ )                     | 0.79                     | -0.37                    | 46.52                            | 21.20                     |
|        |                         | B( $\text{Fe}^{3+}$ )                     | 0.38                     | 0                        | 47.64                            | 23.22                     |

The obtained hyperfine fitting results for LERs and SERs can be discussed considering possible model of core/shell structure assuming that some sample region in the core obey the bulk  $\text{Fe}_3\text{O}_4$

composition (i.e., stoichiometric) though the remaining portion are non-stoichiometric at vacancies/defects probably within the shell/surface region, in agreement with previous results reported elsewhere <sup>1</sup>. The presence of stoichiometric Fe<sub>3</sub>O<sub>4</sub> in these sample is the signature of the possible Verwey phase transition, which occurs near 120 K <sup>2</sup>. Below the Verwey temperature T<sub>v</sub>, the valence states of iron ions in both A- and B-sites are mostly stable, though above T<sub>v</sub> an electron exchange among Fe<sup>2+</sup> and Fe<sup>3+</sup> ions in octahedral B-sites appears and hence these valence states get unstable, giving rise to changes in many physical properties along with structural change from monoclinic to cubic, in agreement with the clear observation of Verwey phase transition in ZFC curve, shown in Figure 4a.

Moreover, it is well known that magnetic moment (M) per formula unit for the stoichiometric Fe<sub>3</sub>O<sub>4</sub> is 'M' = 4 μ<sub>B</sub>. In the present work, the part of non-stoichiometry in LERs, SERs, and NSs led to the magnetic moment 'M' = 3.76 μ<sub>B</sub> with δ = 0.12 and hence can be represented by non-stoichiometric formula Fe<sub>2.88</sub>O<sub>4</sub>, 'M' = 3.68 μ<sub>B</sub> with δ = 0.14 and represented by Fe<sub>2.86</sub>O<sub>4</sub>, and 'M' = 3.52 μ<sub>B</sub> with δ = 0.16 and represented by Fe<sub>2.88</sub>O<sub>4</sub> for LERs, SERs, and NSs respectively. The increased number of vacancies and surface effects from LERs to NSs is believed to be due to a rise in concentration of phosphate anions during synthesis.

## References

- (1) Lyubutin, I. S.; Lin, C. R.; Korzhetskiy, Y. V.; Dmitrieva, T. V.; Chiang, R. K. Mössbauer Spectroscopy and Magnetic Properties of Hematite/Magnetite Nanocomposites. *J. Appl. Phys.* **2009**, *106* (3). <https://doi.org/10.1063/1.3194316>.
- (2) VERWEY, E. J. W. Electronic Conduction of Magnetite (Fe<sub>3</sub>O<sub>4</sub>) and Its Transition Point at Low Temperatures. *Nature* **1939**, *144* (3642), 327–328. <https://doi.org/10.1038/144327b0>.
